# Supplementary material for: A Randomized-Controlled Trial Evaluating the Impact of a Web Tutorial on Perceptions and Usage of Opioids Post-Carpal Tunnel Release Surgery
Source: PubMed Central journal article supplement — J Hand Surg Glob Online. 2024 Apr 12;6(4):514–8. doi: 10.1016/j.jhsg.2024.03.010 (PMC11331156; doi:10.1016/j.jhsg.2024.03.010), 2024-04-12
Supplement: mmc3.pdf [file mmc3.pdf]

Thank you for your willingness to participate in this study! This survey should take approximately 10 minutes and will ask questions about pain management after carpal tunnel release surgery.

Please enter your study ID that is provided by the researcher below.

---

What is your age? (sliding scale on online survey will be used to collect this information with options from 18-100 years)

What is your gender?

- Cis-gender woman
- Cis-gender man
- Non-binary
- Trans-gender woman
- Trans-gender man
- Other/Prefer not to say

What race do you identify with?

- White
- Black
- American Indian or Alaska Native
- Asian
- Native Hawaiian or Pacific Islander
- Other

Have you taken opioids before (either as a prescription or other reasons)?

- Yes
- No

What is your highest level of education?

- Some high school
- Completed high school
- Completed college
- Some form of secondary education (e.g. masters, PhD, MD, JD)

Did you watch a Web Tutorial on Pain Management at your final pre-op visit?

- No
- Yes

What day post-op are you? (sliding scale with options of day 0 to day 21)

Please answer the questions based on how true you think the statements are, with 1 being you think this is true with complete certainty, 5 being you think this is false with complete certainty, and 3 being you are not sure.

I expected to experience immediate relief of my symptoms after carpal tunnel release surgery.

Almost all patients experience relief of symptoms after carpal tunnel syndrome.

The best way to manage pain after carpal tunnel release syndrome is with opioids.

Opioids are superior to non-opioids (e.g. ibuprofen) at managing pain after carpal tunnel release syndrome.

There are no risks associated with taking opioids for pain management after carpal tunnel release syndrome.

I knew what to expect with my pain before carpal tunnel release surgery.

I am satisfied with my pain management after carpal tunnel release surgery.

**On your first post-op day**, did you take any opioids after your carpal tunnel release surgery?

- No
- Yes at least once
- Yes multiple times

**During post-ops days 2-6**, did you take any opioids after your carpal tunnel release surgery?

- No
- Yes at least once
- Yes multiple times

**During post-ops days 7-14**, did you take any opioids after your carpal tunnel release surgery?

- No
- Yes at least once
- Yes multiple times

Do you think that you are at risk of prolonged opioid usage?

- Definitely not
- Probably not
- Maybe
- Probably yes
- Definitely yes
